# Supplementary material for: Signs and symptoms preceding the diagnosis of Alzheimer’s disease: a systematic scoping review of literature from 1937 to 2016
Source: PubMed Central journal article supplement — BMJ Open. 2017 Aug 28;7(8):e015746. doi: 10.1136/bmjopen-2016-015746 (PMC5724073; doi:10.1136/bmjopen-2016-015746), 2017-08-28
Supplement: bmjopen-2016-015746supp001.pdf [file bmjopen-2016-015746supp001.pdf]

## **Appendix 1**

### **MEDLINE search strategy:**

1. Alzheimer's/
2. Alzheimer's disease/
3. Cognitive disease/
4. Cognitive impairment\*.tw.
5. Cognitive decline\*. tw.
6. Cognitive changes\*.tw.
7. Mild cognitive impairment\*.tw.
8. Brain pathology \*.tw.
9. Memory Imbalance \*.tw.
10. Or /1-9
11. Early signs and symptoms/
12. Early symptoms \*.tw.
13. Early signs \*.tw.
14. Early presentations \*.tw.
15. Early manifestations \*.tw.
16. Early detection \*.tw.
17. Clinical presentations/ preclinical \*.tw.
18. Characteristics \*.tw.
19. Clinical features\*.tw.
20. Brain pathology/
- 21 .Behavioural symptoms and signs/
22. Psychological symptoms and signs/
23. Neuropsychological symptoms and signs/
24. Neuropsychiatric inventory/
25. Extrapyrarnidal symptoms/
26. Pyramidal symptoms/

27. Or /11-26
28. 25 or 27
29. Early onset Alzheimer's disease/
30. Early onset AD \*.tw.
31. Early onset familial AD\*.tw.
32. Early onset sporadic AD\*.tw.
33. Early genetic AD\*.tw.
34. Or /29-33
35. 28 or 34
35. Late onset Alzheimer's disease/
36. Late degenerative disease \*.tw.
37. Late onset AD\*.tw.
38. Late onset sporadic AD\*.tw.
39. Late onset familial AD \*.tw.
40. Or / 35-39
41. 34 or 40
42. Dementia\*.tw.
42. Markers/
43. Computed tomography\*.tw.
44. Cerebrospinal fluid analysis\*.tw.
45. CSF\*.tw.
46. Mini-mental state examination\*.tw.
47. MMSE \*.tw.
48. Screening \*.tw.
49. Cognitive examination\*.tw.
50. Magnetic resonance imaging \*.tw.
51. MRI \*.tw.
52. PET scan \*.tw.

53. SPECT scan \*.tw.
54. Or/42-53
55. 41 or 54
56. Developed countries/
57. Andorra \*.tw.
58. Argentina \*.tw.
59. Australia \*.tw.
60. Austria \*.tw.
61. Bahrain \*.tw.
62. Belgium \*.tw.
63. Bermuda \*.tw.
64. Brunei \*.tw.
65. Canada \*.tw.
66. Chile \*.tw.
67. Croatia \*.tw.
68. Cyprus \*.tw.
69. The Czech Republic \*.tw.
70. Denmark \*.tw.
71. Estonia \*.tw.
72. Faroe Island \*.tw.
73. Finland \*.tw.
74. France\*.tw.
75. Germany\*.tw.
76. Greece\*.tw.
77. Holy see (Vatican) \*.tw.
78. Hong Kong \*.tw.
79. Iceland \*.tw
80. Ireland\*.tw.

81. Israel \*.tw.
82. Italy\*.tw.
83. Japan\*.tw.
84. Korea South\*.tw.
85. Kuwait\*.tw.
86. Latvia\*.tw.
87. Liechtenstein \*.tw.
88. Lithuania\*.tw.
89. Luxembourg\*.tw.
90. Malta\*.tw.
91. Monaco\*.tw.
92. Montenegro\*.tw.
93. Netherlands\*.tw.
94. New Zealand\*.tw.
95. Norway\*.tw.
96. Poland\*.tw.
97. Portugal\*.tw.
98. Qatar\*.tw.
99. San Marino \*.tw.
100. Saudi Arabia \*.tw.
101. Singapore \*.tw.
102. Slovakia\*.tw.
103. Slovenia \*.tw.
104. South Africa \*.tw.
105. Spain\*.tw.
106. Sweden\*.tw.
107. Switzerland\*.tw.
108. Turley\*.tw.

109. United Arab Emirate\*.tw.

110. United Kingdom\*.tw.

111. United States\*.tw.

112. OR/ 56-111.

Other databases

**PSYCINFO (1806-9<sup>th</sup> May 2016):** Same MeSH, keywords, limits and study types used in MEDLINE search with appropriate syntax.

**Cochrane Library (CMR last update 2012):** Same MeSH, keywords, and date limits used as per MEDLINE search. The adjusted syntax for Cochrane based search.

**CINAHL (1937-7<sup>th</sup> May 2016):** Same MeSH, keywords, and study types as used in MEDLINE with appropriate syntax.

**Nursing Index (1994-7<sup>th</sup> May 2016):** Same MeSH, keywords and study types as per MEDLINE search with suitable syntax.

**Grey Literatures:**

Dates for search: 9<sup>th</sup> May 2016. Included terms were AD, terms for cognitive impairment and limit same as databases limits.
